# 1 Comparative architectures of direct and social genetic 2 effects from the genome-wide association study of 170 3 phenotypes in outbred laboratory mice

4  
5 Amelie Baud<sup>1\*</sup>, Francesco Paolo Casale<sup>1,2</sup>, Jerome Nicod<sup>3</sup>, Oliver  
6 Stegle<sup>1,4\*</sup>

7  
8 <sup>1</sup> European Molecular Biology Laboratory, European Bioinformatics Institute, Wellcome Genome  
9 Campus, CB10 1SD Hinxton, Cambridge, UK

10 <sup>2</sup> Microsoft Research New England, Cambridge, Massachusetts, USA

11 <sup>3</sup> Wellcome Trust Centre for Human Genetics, Roosevelt Drive, Oxford OX3 7BN, UK

12 <sup>4</sup> European Molecular Biology Laboratory, Genome Biology Unit, Heidelberg, DE

13  
14 \* Corresponding authors: [abaud@ebi.ac.uk](mailto:abaud@ebi.ac.uk) and [oliver.stegle@embl.de](mailto:oliver.stegle@embl.de)

## 15 16 Abstract

17  
18 Social genetic effects (SGE, also called indirect genetic effects) are associations  
19 between genotypes of one individual and phenotype of another. SGE can arise when  
20 two individuals interact and heritable traits of one individual influence the phenotype  
21 of the other. To better understand the architecture of SGE, we re-analysed an existing  
22 dataset comprising 170 behavioural, physiological and morphological phenotypes  
23 measured in outbred laboratory mice. For all phenotypes and in order to compare SGE  
24 with better-known direct genetic effects (DGE, associations between an individual's  
25 genotypes and their own phenotype), we analysed polygenic models with random  
26 terms for SGE and DGE and performed the genome-wide association study of both  
27 SGE (sgeGWAS) and DGE (dgeGWAS). Our analyses yielded two main insights: first,  
28 SGE and DGE *acting on the same phenotype* generally arise from partially different  
29 loci and/or loci with different effect sizes; secondly, individual SGE associations  
30 typically explain less phenotypic variance than DGE associations. Our results shed  
31 light on the architecture of SGE and have important implications for the design of future  
32 studies. Importantly, we detail and validate methods that can be used for sgeGWAS

33 in outbred populations with any levels of relatedness and group sizes, and provide  
34 software to perform these analyses.

35

36

## 37 **Main text**

38

### 39 **Introduction**

40

41 Social interactions between two individuals can result in the phenotype of one  
42 individual being affected by genotypes of their social partner. Such effects arise when  
43 heritable traits of the social partner influence the phenotype of interest (Figure 1a),  
44 and are called indirect genetic effects or social genetic effects<sup>1-4</sup> (SGE).

45 SGE have been shown to contribute significantly and substantially to  
46 phenotypic variation in livestock, wild animals, plants and laboratory model organisms  
47 (see review by Bijma<sup>5</sup> and subsequent references). In laboratory mice, SGE have  
48 been found to affect a broad range of phenotypes including behavioural, physiological,  
49 and morphological traits<sup>6-9</sup>, and in humans effects of non-transmitted parental alleles  
50 have been detected on offspring's educational attainment<sup>10-12</sup>. Thus, SGE are an  
51 important component of the genotype to phenotype path, and understanding their  
52 architecture is important.

53 SGE can be used as a tool to identify traits of social partners affecting a  
54 phenotype of interest. For example, a candidate gene study of SGE on plumage  
55 condition in laying hens<sup>13</sup> found an indirect association with the serotonin receptor 2C  
56 gene. As the serotonergic system is known to control behaviour, this SGE  
57 association is consistent with observations of cage mates influencing the plumage of  
58 a focal hen through feather pecking. When traits of social partners affecting the  
59 phenotype of interest are unknown, the genome-wide association study of SGE  
60 (sgeGWAS) may be a promising avenue. Indeed, similarly to how GWAS of  
61 "traditional" direct genetic effects (DGE, effects of an individual's genotypes on its own  
62 phenotype) has provided valuable insights into the "within-body" pathways affecting  
63 disease and quantitative phenotypes<sup>14</sup>, sgeGWAS could help dissect the "between-  
64 bodies" pathways of social effects and provide clues on the traits of social partners

65 that mediate social effects. Deploying sgeGWAS reliably and efficiently will however  
66 require a good understanding of the architecture of SGE.

67 Information on the architecture of SGE is relatively sparse, as few studies have  
68 identified genomic loci that influence phenotypes of social partners. Quasi-Mendelian  
69 SGE exist<sup>15,16</sup> but candidate gene studies and GWAS of SGE have revealed oligo- or  
70 polygenic architectures for a larger number of phenotypes<sup>7,8,13,17,18</sup>. Two key features  
71 of such complex architectures are the degree of overlap between SGE and DGE loci,  
72 and the proportion of variance explained by SGE loci. The degree of overlap between  
73 SGE and DGE has most often been studied in terms of the genome-wide correlation  
74 between SGE and DGE effect sizes, and it has been shown to be an important  
75 determinant of the response of a phenotype to selection<sup>19-24</sup>. In addition, whether the  
76 strongest SGE and DGE for any given phenotype arise from the same loci is of  
77 practical interest: it determines how redundant sgeGWAS may be with dgeGWAS of  
78 the same phenotype and whether loci identified in dgeGWAS may also have effects  
79 on the same phenotype of partners.

80 Similarly, the variance explained by individual SGE loci is both of fundamental  
81 and practical interest, as it provides insights into the evolutionary process and  
82 determines the power of sgeGWAS. Estimates of the variance explained by individual  
83 SGE loci are most informative when similar estimates for DGE loci acting on the same  
84 phenotype and in the same population are available for comparison. Of the few studies  
85 that have mapped SGE<sup>7,8,13,17,18,25</sup>, only two have reported SGE and DGE loci *acting*  
86 *on the same phenotype*. One of these reported that DGE loci explain a much greater  
87 proportion of phenotypic variance than SGE loci<sup>17</sup> while the other found similar effect  
88 sizes for individual SGE and DGE loci<sup>8</sup>. Given the sparsity of information, expectations  
89 on the effect sizes of SGE are difficult to build.

90 In order to improve our understanding of the architecture of SGE, we leveraged  
91 an existing dataset of 170 behavioural, physiological and morphological phenotypes  
92 measured in outbred “CFW” laboratory mice<sup>26,27</sup> (Figure 1c). We studied both SGE  
93 and DGE acting on each of these 170 phenotypes (Figure 1b) using polygenic models  
94 and GWAS. Specifically, we investigated whether SGE and DGE arise from similar  
95 loci, and compared the effect sizes of SGE loci to those of DGE loci.

96

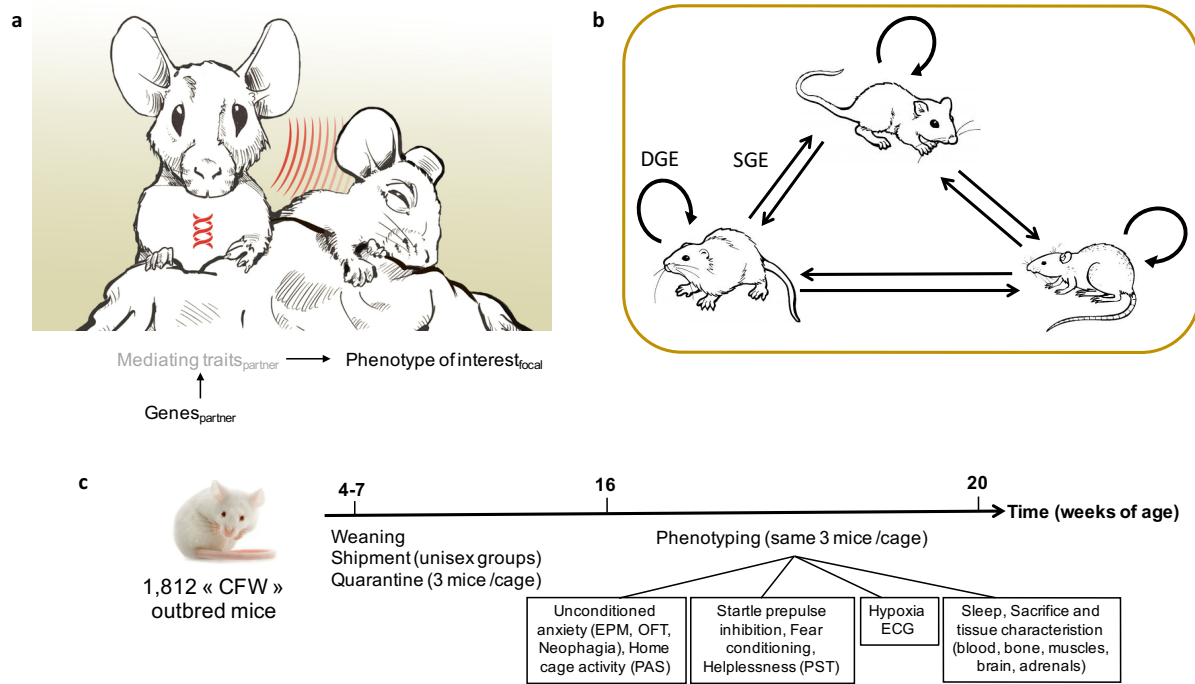

97  
 98 **Figure 1** Illustration of social genetic effects (SGE), definition of specific terms used  
 99 throughout the manuscript, and experimental design. (a) SGE arise when two  
 100 individuals interact and heritable traits of one influence the phenotype of the other. In  
 101 other words, genotypes of the “social partner” influence - through “mediating traits” -  
 102 the “phenotype of interest”, measured in the “focal individual”. Importantly, these  
 103 mediating traits are not measured. (b) 1,812 “CFW” outbred mice were housed in  
 104 groups of 3 mice per cage. SGE and DGE contributed by each mouse were modelled,  
 105 such that each mouse served as both focal individual and cage mate in our analyses.  
 106 (c) Housing conditions and phenotyping.

107

108

## 109 Results

110

111 Genome-wide genotypes and 200 behavioural, physiological and morphological  
 112 phenotypes for 2,073 commercially-available, outbred CFW mice were available from  
 113 Nicod et al.<sup>26</sup> and Davies et al.<sup>27</sup>. Males were always housed with males and females  
 114 with females, and mice were left undisturbed in their cages for at least nine weeks  
 115 before phenotyping started (Figure 1c). We only kept mice that had the same two cage  
 116 mates over the course of the experiment (1,869 total). Furthermore, we excluded 57  
 117 mice that formed genetic substructures (see Methods) so that the remaining 1,812  
 118 mice were as equally related as possible while retaining as large a sample size as

119 possible. We analysed a subset of 170 phenotypes that could be satisfactorily  
120 normalised (see Methods). The exact number of mice used for each phenotype, is  
121 shown in Supplementary Table 1.

122

### 123 **Aggregate contribution of SGE**

124 We first estimated the aggregate contribution of SGE to each phenotype (i.e. the sum  
125 of SGE across the genome). To do so, we used the variance decomposition method  
126 detailed in Baud et al.<sup>9</sup>, which features random effects for DGE, SGE, direct and social  
127 environmental effects, and “cage effects” (see Methods). SGE, in aggregate,  
128 explained up to 22% (+/- 6%) of variation in serum LDL levels and an average of 11%  
129 across 9 phenotypes with significant aggregate SGE (FDR < 10%, Supplementary  
130 Table 1). Those 9 phenotypes included behavioural (helplessness, a murine model for  
131 depression), physiological (serum LDL cholesterol, wound healing, blood eosinophils,  
132 serum alpha-amylase concentration, blood platelets, acute hypoxic response), and  
133 morphological (weight of adrenal glands) traits. For many of these phenotypes, the  
134 pathways underlying social effects, i.e. the traits of cage mates that mediate social  
135 effects, are unknown.

136

### 137 **Overlap between SGE and DGE loci acting on the same phenotype**

138 The polygenic model used for variance decomposition fits a correlation coefficient  $\rho$   
139 that measures the correlation between the SGE and DGE random effects of the model  
140 (see Methods). Thus,  $\rho$  quantifies the extent to which SGE and DGE acting on the  
141 same phenotype arise from similar loci, with similar effect sizes. We stress that, in this  
142 section and throughout the manuscript, we compare SGE and DGE *acting on the*  
143 *same phenotype* (but do this for all 170 phenotypes). Simulations showed that the  
144 precision with which  $\rho$  can be estimated depends on the aggregate contribution of both  
145 SGE and DGE (Supplementary Figure 1), so we limited the analysis of  $\rho$  to 28  
146 phenotypes for which both aggregate SGE and aggregate DGE explained more than  
147 5% of phenotypic variation. The value of  $\rho$  varied between -0.28 (+/-0.35) and 1(+/-  
148 0.09) across these traits, with an average of 0.42 (Figure 2 and Supplementary Table  
149 1). For 10 out of the 28 phenotypes where  $\rho$  could be more precisely estimated,  $\rho$  was  
150 significantly different from zero (nominal  $P < 0.05$ ), suggesting that loci affecting a  
151 phenotype directly also sometimes influence the same phenotype of cage mates. The

152 strongest evidence for shared SGE and DGE loci ( $\rho \neq 0$  at Bonferroni-corrected  $P <$   
153 0.05) was for healing from an ear punch, weight of the adrenal glands, serum LDL  
154 cholesterol levels, and mean platelet volume.

155 We also evaluated evidence that  $|\rho|$  was different from one (i.e.  $\rho$  different from  
156 one and minus one) in order to empirically evaluate the widely-influential model of  
157 “phenotypic contagion”. Phenotypic contagion or “spread” is a model for social effects  
158 whereby the phenotype of interest of a focal individual is affected by the same  
159 phenotype of their social partners. In humans, cognitive susceptibility to depression,  
160 alcohol consumption, stress, obesity and educational attainment, for example, have  
161 been shown to be “contagious” or “spread” across college roommates, spouses,  
162 friends, or parent/offspring<sup>10-12,28-32</sup>. As a result, phenotypic contagion has shaped the  
163 way we think about social effects: for example, phenotypes unlikely to spread have  
164 been used to cast doubt on social network effects<sup>33</sup>. Here we leveraged the parameter  
165  $\rho$  to test whether phenotypic contagion was sufficient to account for SGE: under a  
166 model of pure phenotypic contagion,  $|\rho|$  is expected to be equal to one; on the contrary,  
167 if traits of social partners other than the phenotype of interest mediate social effects,  
168  $|\rho|$  is expected to be different from one. We found that  $|\rho|$  was significantly different  
169 from one (nominal  $P < 0.05$ ) for 10 out of 28 phenotypes. The most significant  $P$  value  
170 (0.00066, significant after Bonferroni correction) was found for immobility in the first  
171 two minutes of the Porsolt swim test, a measure of helplessness that is relevant to  
172 depression. This latter result suggests that phenotypes that spread may additionally  
173 be affected by other traits of social partners. These results motivate the use of  
174 sgeGWAS as a tool to more broadly understand social effects.

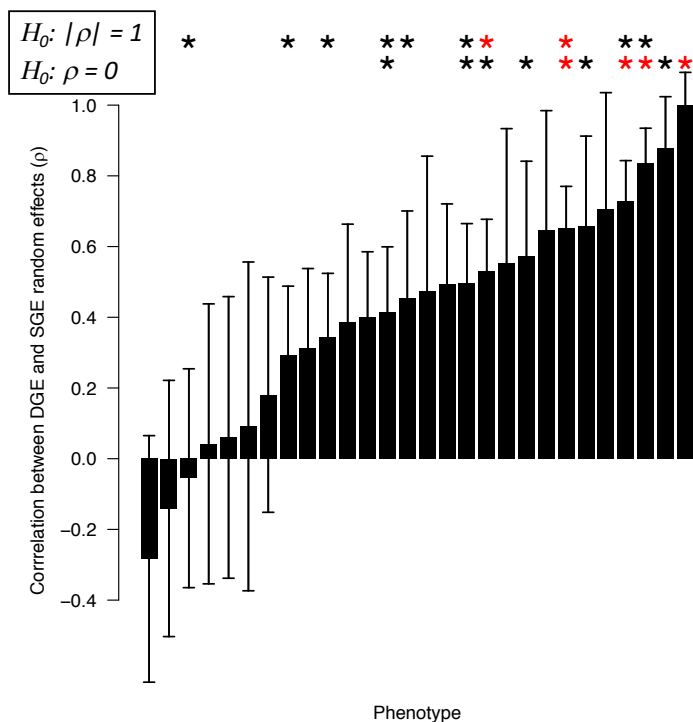

175

176 **Figure 2** Correlation  $\rho$  between SGE and DGE random effects (see Methods). The 28  
 177 phenotypes included in this table are those for which the correlation  $\rho$  could be more  
 178 precisely estimated, i.e. phenotypes with aggregate SGE and aggregate DGE  $> 5\%$ .  
 179 The bars show the standard errors. The stars represent the P value for rejecting  $H_0: \rho$   
 180  $= 0$  (bottom) and  $H_0: |\rho| = 1$  (i.e. pure phenotypic contagion, top). \* denotes nominal  
 181 P value  $< 0.05$ , \* denotes Bonferroni-corrected P value  $< 0.05$ .

182

### 183 **sgeGWAS and dgeGWAS of 170 phenotypes**

184 To map SGE and following Biscarini et al.<sup>13</sup> and Brinker et al.<sup>25</sup>, we calculated the  
 185 “social genotype” of a mouse at a variant as the sum of the reference allele dosages  
 186 of its cage mates at the variant, and tested for association between social genotype  
 187 and phenotype. In order to avoid spurious associations, we accounted for background  
 188 SGE, DGE and non-genetic effects using an extension of the variance components  
 189 model used for variance decomposition. In the sgeGWAS we also accounted for DGE  
 190 of the variant tested for SGE, by including direct genotypes at the locus as a covariate  
 191 (See Methods). Similarly, in the dgeGWAS we included social genotypes at the locus  
 192 as a covariate. We hereafter refer to this strategy as “conditioning”. We found that  
 193 conditioning was necessary to avoid spurious associations in the sgeGWAS due to  
 194 co-localised DGE. As we show in the Supplementary Note, this problem originates  
 195 from the use of each mouse as both focal individual and cage mate in the analysis, a



196 strategy that has been used before to maximise sample size when all individuals are  
197 phenotyped and genotyped<sup>13,25</sup>. Importantly, spurious associations may arise even if  
198 all individuals are strictly unrelated (Supplementary Note). Using each mouse as both  
199 focal individual and cage mate in the analysis results in direct and social genotypes at  
200 a locus being correlated (Supplementary Figures 2a and 2b), which leads to  
201 sgeGWAS P values being inflated under the null in the presence of a simulated, co-  
202 localised large-effect DGE (Supplementary Figure 2c). This issue has not previously  
203 been reported and may have resulted in spurious SGE associations when conditioning  
204 was not used<sup>13</sup>.

205 We show that conditioning on direct genotypes at the locus yielded calibrated  
206 sgeGWAS P values for null phenotypes (Supplementary Figure 2d), indicating that  
207 genome-wide significance thresholds may be derived for sgeGWAS by permuting  
208 social genotypes (see Methods), as long as conditioning is used in the analysis. A  
209 power analysis suggested that conditioning may slightly decrease power to detect  
210 SGE in the absence of co-localised DGE, particularly when direct and social  
211 genotypes are highly correlated (Supplementary Figure 3a and 3c) but would increase  
212 power if the locus also gave rise to DGE (Supplementary Figures 3b and 3d).

213 In order to compare, for each phenotype, the results of sgeGWAS and  
214 dgeGWAS, we defined loci based on the average size of the 95% confidence interval  
215 in this population, namely 1.5Mb<sup>26</sup>, and, following Nicod et al.<sup>26</sup>, used a per-phenotype  
216 FDR approach (see Methods). At a 10% FDR threshold, sgeGWAS identified 24  
217 genome-wide significant loci for 17 of the 170 phenotypes (Figure 3 and  
218 Supplementary Table 2). In comparison, dgeGWAS identified 121 genome-wide  
219 significant loci for 63 phenotypes at the same threshold (Figure 3 and Supplementary  
220 Table 3).

221 There was no overlap between genome-wide significant SGE and DGE loci  
222 *acting on the same phenotype*. However, variants at genome-wide significant SGE  
223 loci were enriched in small P values in the corresponding dgeGWAS (Supplementary  
224 Figure 4). Together these results suggest a partially distinct basis for SGE and DGE  
225 *acting on the same phenotype* (i.e. partially different loci and/or effect sizes), which is  
226 consistent with the results from the analysis of the correlation parameter  $\rho$ .



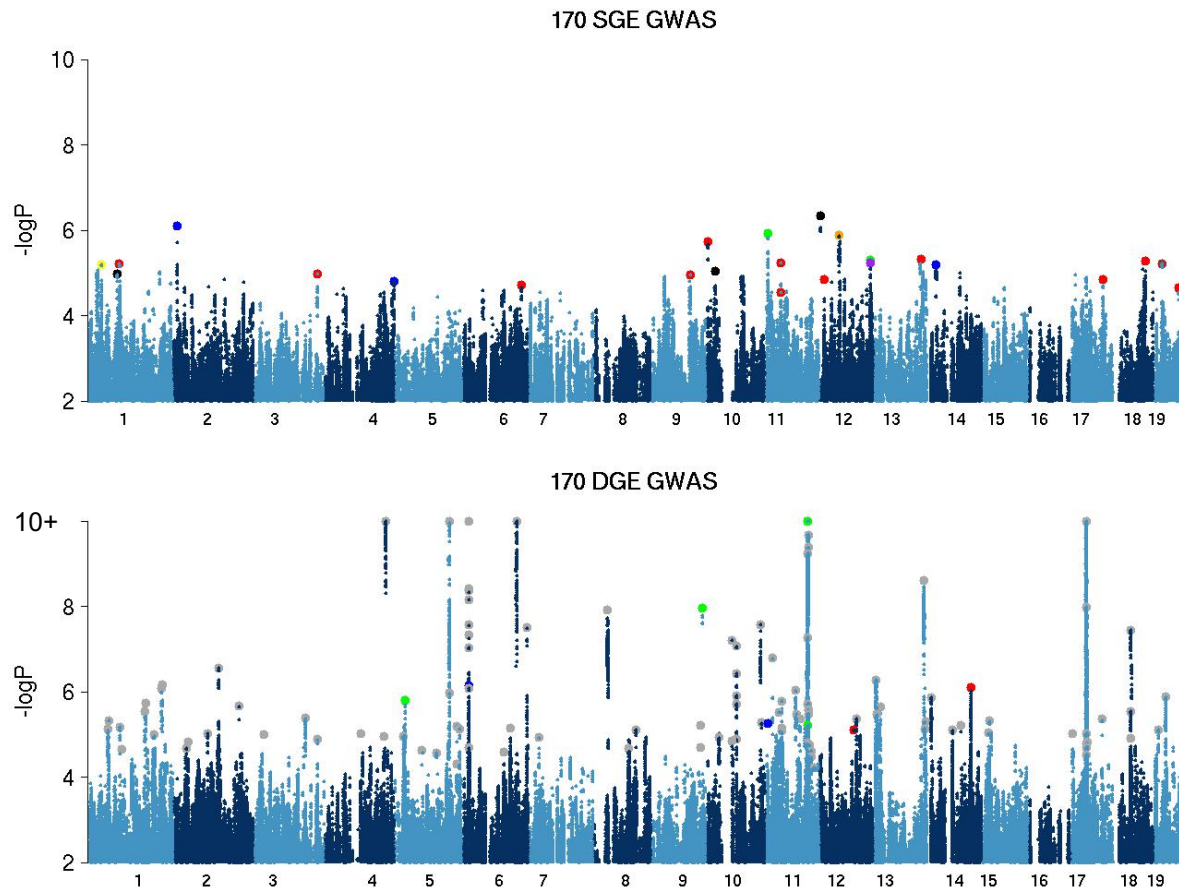

227

228 **Figure 3** Superimposed manhattan plots corresponding to 170 sgeGWAS (top panel)  
229 and 170 dgeGWAS (bottom panel) of the same phenotypes. DGE associations with a  
230  $-\log P$  greater than 10 were plotted at  $-\log P$  10 (as indicated by 10+). Data points with  
231 negative log  $P < 2$  are not shown. Lead variants for all genome-wide significant SGE  
232 and DGE loci are represented with a larger dot. In the SGE panel, each color  
233 corresponds to a class of phenotypes: behavioural (red, includes 7 behavioural  
234 phenotypes with a detected SGE locus), adult neurogenesis (black, 2 phenotypes),  
235 immune (orange, 1 phenotype), haematological (yellow, 1 phenotype), blood  
236 biochemistry (blue, 2 phenotypes), bone phenotypes (green, 2 phenotypes), heart  
237 function (brown, 1 phenotype), and lung function (purple, 1 phenotype). In the DGE  
238 panel, a genome-wide significant locus is colored grey when the corresponding  
239 phenotype does not have a genome-wide significant SGE association; when the  
240 corresponding phenotype does have an SGE association, the same color is used as  
241 in the SGE panel.

242

243 Compared to many other mouse populations used for mapping, linkage  
244 disequilibrium decays rapidly in the CFW population<sup>26,34</sup>. At each genome-wide

245 significant SGE locus we identified candidate genes, prioritising well-annotated genes  
246 (see Methods). At five genome-wide significant SGE loci we identified a single  
247 candidate gene (Supplementary Table 2, locus zoom plots in Supplementary Figure  
248 5): *Abca12*, a gene known for its involvement in lipid transport and homeostasis in the  
249 skin<sup>35</sup>, at an SGE locus for adult neurogenesis in the hippocampus; *Epha4*, a  
250 signalling genes involved in neural system function, at an SGE locus for helplessness;  
251 *H60c*, a poorly characterised gene potentially involved in skin immunity<sup>36</sup>, at an SGE  
252 locus for locomotor activity; *Pgk1-rs7*, a pseudogene of phosphoglycerate kinase-1, at  
253 and SGE locus for sleep; and *Ighv5-9-1*, a variable region of the T cell receptor, at an  
254 SGE locus for response to hypoxia. None of these genes have known direct effects  
255 that can easily explain the observed SGE, nor did they seem to have DGE on the  
256 phenotype in this dataset (Supplementary Figure 5), so the results of our sgeGWAS  
257 point to yet unknown traits of cage mates that influence the five phenotypes above.

258 Of these candidate genes, one, *Epha4*, has previously been associated with  
259 the phenotype of interest. *Epha4* expression in the hippocampus was found to be  
260 affected by chronic mild stress in mice and responsive to antidepressant treatment<sup>37</sup>.  
261 We also found suggestive DGE of *Epha4* on helplessness (Supplementary Figure 5),  
262 confirming that some level of phenotypic contagion was likely for that phenotype. The  
263 other candidate genes did not immediately permit to generate hypotheses on the traits  
264 of cage mates mediating the social effects. To gain such insights from the results of  
265 sgeGWAS, it is likely that other data types (e.g. gene expression) will need to be  
266 integrated. Alternatively, larger sample sizes would permit identification of additional  
267 SGE loci, some of which might immediately provide insights into the traits of partners  
268 that mediate social effects. SgeGWAS, in that respect, is similar to dgeGWAS<sup>14,38,39</sup>.

269

## 270 **Architecture of SGE and comparison with that of DGE**

271 Despite being carried out on the same individuals and phenotypes, and in a perfectly  
272 analogous manner, sgeGWAS identified fewer genome-wide significant associations  
273 than dgeGWAS (24 associations for 17 phenotypes and 121 associations for 63  
274 phenotypes respectively). As the determinants of power for SGE have not been  
275 investigated, it is not clear whether we had more or less power to detect SGE  
276 associations compared to DGE associations. In order to get a better understanding of  
277 this issue, we simulated local SGE or DGE arising from a single causal variant and  
278 calculated power to detect these associations. Briefly (see Methods), we considered

279 random groups of two or three mice per cage, and simulated phenotypes arising from  
280 the sum of local genetic effects (DGE or SGE), polygenic effects (DGE and SGE), and  
281 non-genetic effects. We simulated local SGE according to two alternative generative  
282 models, both consistent with the analysis model used for sgeGWAS: an “additive”  
283 model according to which social effects add up across cage mates, and a  
284 “proportional” model corresponding to a scenario where the focal mouse interacts with  
285 only one cage mate at a time, spending equal time with each cage mate. Note that the  
286 additive and proportional models are equivalent when there is a single cage mate (i.e.  
287 two mice per cage). For all three types of local effects (DGE, additive SGE and  
288 proportional SGE) we simulated the same allelic effect. Finally, we considered variants  
289 with low, medium or high minor (direct) minor allele frequencies (MAF, see Methods).

290 Our simulations showed that power always increased with MAF (Figure 3a). At  
291 a given MAF, simulating SGE from a single cage mate led to the same power for SGE  
292 and DGE. Simulating SGE arising from two cage mates additively led to greater power  
293 to detect SGE associations compared to DGE associations. In contrast, simulating  
294 SGE arising from two cage mates under the proportional model led to lower power for  
295 SGE compared to DGE. These results are consistent with the fact that, for a given  
296 sample size, power to detect a local effect (DGE or SGE) is determined by the sample  
297 variance of the simulated effect. Noting MAF as  $p$ , number of cage mates as  $N$ , and  
298 allelic effect as  $b$ , that variance is expected to be  $2p(1-p)b^2$  for DGE,  $2Np(1-p)b^2$  for  
299 SGE simulated under the additive model, and  $2Np(1-p)/N^2 b^2$  for SGE simulated under  
300 the proportional model (see Methods). In conclusion, our simulations showed that  
301 power to detect individual SGE associations is determined not only by allelic effect  
302 and MAF of the causal variants, but also by the way SGE arise across cage mates  
303 (additively or not) and the number of cage mates. In the real data, the way SGE arose  
304 across cage mates is not known, so it is not possible to determine the primary cause  
305 for the smaller number of genome-wide significant SGE associations compared to  
306 DGE associations.

307 Comparing genome-wide significant SGE and DGE associations in terms of  
308 proportion of phenotypic variance explained yielded two main results: firstly, individual  
309 genome-wide significant SGE associations explained a maximum of 2.5% of  
310 phenotypic variance, while eleven genome-wide significant DGE associations  
311 explained more than 5% of phenotypic variance and up to 40% (Figure 3b,  
312 Supplementary Table 2 and Supplementary Table 3). Average values were 1.8% for

313 SGE and 2.7% for DGE associations. As these results are born from the analysis of  
314 170 phenotypes, it suggests that SGE associations will generally be more difficult to  
315 detect than DGE associations. Secondly, for each phenotype we compared the  
316 variance explained jointly by all genome-wide SGE (respectively DGE) associations  
317 to the variance explained by SGE (respectively DGE) in aggregate. We found that  
318 genome-wide significant associations explained a large proportion of the  
319 corresponding genetic variance for both SGE and DGE (Figure 3c). More precisely,  
320 across 5 phenotypes with aggregate contribution of SGE greater than 5% and at least  
321 one genome-wide significant SGE association, we found that an average of 32.5% of  
322 the aggregate variance was explained by genome-wide significant associations. For  
323 DGE, that figure was calculated across 55 phenotypes and was equal to 32.1%. The  
324 proportion of aggregate variance explained by genome-wide significant associations  
325 may seem large given the relatively small number of genome-wide significant  
326 associations per phenotype (e.g. compared to humans<sup>40</sup>), but is consistent with  
327 studies of DGE in other outbred laboratory rodent populations<sup>41,42</sup> and are the result  
328 of a relatively small number of variants segregating in the CFW population with  
329 relatively high MAFs<sup>26</sup>. In conclusion, our results are consistent with oligo- or polygenic  
330 architectures for SGE. A more precise estimation of the number of loci involved will  
331 only be possible when more SGE associations are discovered in other datasets.  
332

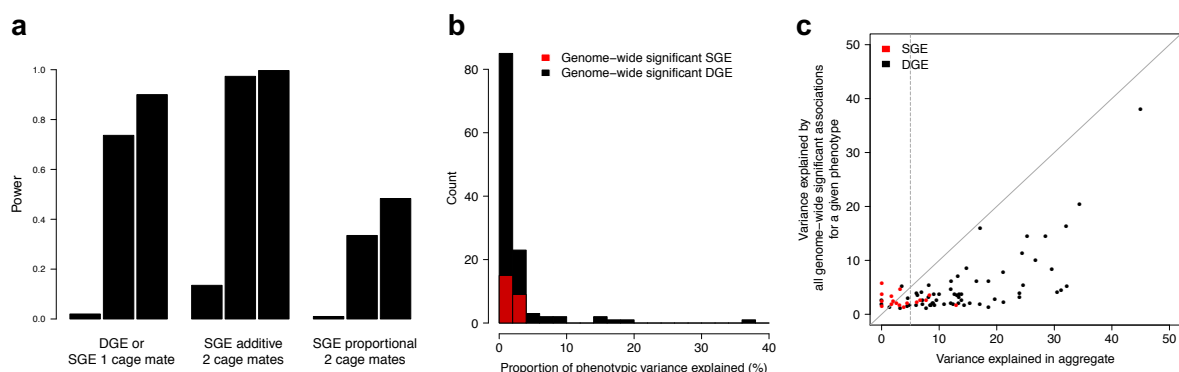

333

334 **Figure 3** Power to detect local SGE and DGE, and characterisation of the architecture  
335 of SGE and DGE. (a) Power to local genetic effects in simulations. Three types of local  
336 genetic effects were simulated: DGE (or, equivalently, SGE arising from a single cage  
337 mate), SGE arising from two cage mates under an additive model, and SGE arising  
338 from two cage mates under a proportional model (see Main Text). For each type of  
339 effect, results are shown (left to right) for variants with low MAF ( $MAF < 0.05$ ), medium  
340 MAF ( $0.225 < MAF < 0.275$ ) and high MAF ( $MAF > 0.45$ ) (MAF: minor allele frequency,

341 *defined based on direct genotypes). (b) Histogram of the proportion of phenotypic*  
342 *variance explained by individual genome-wide significant SGE (red) and DGE (black)*  
343 *associations. (c) Comparison, for each phenotype, of the variance explained by social*  
344 *(red) and direct (black) genetic effects in aggregate (x axis) and the total variance*  
345 *explained jointly by all genome-wide significant SGE or DGE associations for a*  
346 *phenotype (y axis). Each dot corresponds to a phenotype with at least one genome-*  
347 *wide significant association.*

348

## 349 **Discussion**

350

351 In this study we performed the comparative analysis of both SGE and DGE acting on  
352 each one of 170 behavioural, physiological and morphological phenotypes measured  
353 in outbred laboratory mice, using polygenic models and GWAS. Our results provided  
354 two key insights into the architecture of these complex traits: first, SGE and DGE  
355 *acting on the same phenotype* typically arise from partially different loci and/or loci with  
356 different effect sizes; secondly, SGE associations tend to explain less phenotypic  
357 variation than DGE associations. As we analysed a broad range of phenotypes, the  
358 insights we gained are likely to generalize to other populations and phenotypes.

359 For 10 phenotypes we uncovered evidence that SGE and DGE were  
360 significantly correlated. For example,  $\rho$  was significantly different from zero for the two  
361 measures of helplessness included in this dataset. This result is consistent with prior  
362 evidence that mood spreads across social partners<sup>28,43</sup>. It is also consistent with the  
363 observation that, in this study, two out of the three genome-wide significant SGE loci  
364 for helplessness have suggestive direct effects on helplessness - direct effect that are  
365 further supported by prior reports that *Epha4*, the candidate gene at one of the loci, is  
366 associated with depression and responds to antidepressant treatment<sup>37</sup>. The  
367 pathways that mediate non-zero correlations between SGE and DGE for other  
368 phenotypes were not always obvious (e.g. healing from an ear punch, serum LDL  
369 cholesterol levels) but warrant further investigation of SGE and DGE.

370 A key result from our study is empirical evidence that phenotypic contagion is  
371 often not sufficient to account for social effects, even when it does play a role. Indeed,  
372 for 10 out of 28 tested phenotypes we found that  $|\rho|$  was significantly different from  
373 one, including the two aforementioned measures of helplessness. This result supports



374 efforts to discover other traits of social partners that mediate social effects, and points  
375 to sgeGWAS as a way to do so. It is important to bear in mind, however, that SGE  
376 only capture the genetic component of the traits of partners that mediate social effects.  
377 Hence, traits that are mostly non-genetically determined will be missed by SGE  
378 studies.

379 Our results on the variance explained by individual SGE loci are an important  
380 contribution towards understanding the architecture of SGE and will help design future  
381 experiments such as sgeGWAS. In particular, the fact that SGE loci never explained  
382 a large fraction of phenotypic variance (max 2.5%), while in comparison 11 DGE loci  
383 explained more than 5% of phenotypic variation, shows that sgeGWAS will require  
384 larger sample sizes than dgeGWAS to be equally powered.

385 Finally, our study made several important methodological contributions that will  
386 help design, perform and interpret sgeGWAS, particularly in outbred populations  
387 where both DGE and SGE contribute to phenotypic variation. Specifically, our study  
388 improved our understanding of the determinants of power for SGE and we showed  
389 that correlations between direct and social genotypes at a locus need to be accounted  
390 for to avoid spurious associations. These correlations arise when the same individuals  
391 serve as both focal individuals and social partners in the analysis, even if all individuals  
392 are unrelated. Importantly, similar correlations between direct and social genotypes,  
393 but potentially much stronger, may arise for different reasons in other datasets, notably  
394 when focal individuals and social partners are related, or as a result of direct  
395 assortments (e.g. assortative mating<sup>44,45</sup>, homophily between friends<sup>10</sup>). The methods  
396 we presented here will help avoid spurious associations in such situations.  
397 Importantly, we contribute software and code to reproduce our analyses or analyse  
398 other datasets.

399

400

## 401 **Methods**

402

### 403 *Phenotypes and experimental variables*

404

405 Phenotypes and experimental variables (covariates) for 1,934 Crl:CFW(SW)-US\_P08  
406 (CFW) mice were retrieved from <http://wp.cs.ucl.ac.uk/outbredmice/>. We normalized

407 each phenotype using the boxcox function (MASS package<sup>46</sup>) in R, and excluded  
408 phenotypes that could not be normalised satisfactorily (lambda outside of -2 to 2  
409 interval). The subset of covariates used for each phenotype is indicated in  
410 Supplementary Table 1. Because data for some phenotypes were missing for some  
411 mice, the sample size varied. The sample size for each phenotype after all filtering  
412 (see below) is indicated in Supplementary Table 1.

413

#### 414 *Caging information*

415

416 Mice were four to seven weeks old when they arrived at the phenotyping facility. They  
417 were grouped with their cage mates and then spent nine to twelve weeks undisturbed  
418 in quarantine. They spent a further four weeks together during phenotyping. Males  
419 were always housed with males and females with females.

420 Cage assignments were not included in the publicly available dataset but were  
421 provided by the authors upon request and are now provided in Supplementary Table  
422 4. Cage assignments were recorded at eleven time points throughout the study and  
423 showed that a few mice were taken out of their original cages and singly housed,  
424 presumably because they were too aggressive to their cage mates. When this  
425 happened, we excluded all the mice in that cage from the analysis. We also excluded  
426 cages where some of the mice were “genetically close” (as defined below) to many  
427 other mice. Finally, we only retained cages with exactly three mice per cage. Although  
428 from the sleep test on all mice were singly housed, we still investigated “persistent”  
429 SGE on sleep and tissue phenotypes (persistence over one day for sleep phenotypes  
430 and over a few days for tissue measures).

431

#### 432 *Genome-wide genotypes*

433

434 From <http://wp.cs.ucl.ac.uk/outbredmice/> we retrieved both allele dosages for 7 million  
435 variants and allele dosages for a subset of 353,697 high quality, LD-pruned variants  
436 (as described in Nicod et al.<sup>26</sup>). We used high quality, LD-pruned variants for all  
437 analyses but the identification of candidate genes at SGE loci (see below), for which  
438 we used the full set of variants.

439

#### 440 *Genetic relatedness matrix (GRM) and exclusion of “genetically close” mice*



441

442 The genetic relatedness matrix was calculated as the cross-product of the dosage  
443 matrix after standardizing the dosages for each variant to mean 0 and variance 1.

444 We excluded whole cages of mice based on GRM values as follows: we defined  
445 a “close pair” of mice as having a GRM value greater than 0.3 (based on the histogram  
446 of all GRM values). 199 mice in 145 cages were involved in such close pairs. Excluding  
447 all 145 cages would have resulted in excluding 435 mice out of a total of 1,812, which  
448 would have led to substantially reduced power for sgeGWAS and dgeGWAS. Thus,  
449 we made a compromise and only excluded the 19 cages that were involved in 4 or  
450 more close pairs (57 mice excluded).

451

#### 452 *Variance decomposition*

453

454 The same method as described in details in Baud et al.<sup>9</sup> was used. Briefly, the model  
455 used was:

$$456 \quad y_f = X_f \underline{b} + a_{D,f} + e_{D,f} + Z_f \underline{a}_S + Z_f \underline{e}_S + W_f \underline{c} \quad (0)$$

457  $y_f$  is the phenotypic value of the focal mouse  $f$ ,  $X_f$  is a row of the matrix  $X$  of covariate  
458 values and  $b$  a column vector of corresponding estimated coefficients.  $a_{D,f}$  is the  
459 additive direct genetic effects (DGE) of  $f$ .  $Z_f$  is a row of the matrix  $Z$  that indicates  
460 cage mates (importantly  $Z_{i,i} = 0$ ) and  $\underline{a}_S$  the column vector of additive social genetic  
461 effects (SGE).  $\underline{e}_D$  refers to direct environmental effects and  $\underline{e}_S$  to social environmental  
462 effects.  $W_f$  is a row of the matrix  $W$  that indicates cage assignment and  $c$  the column  
463 vector of cage effects.

464 The joint distribution of all random effects is defined as:

465

$$466 \quad \begin{bmatrix} \underline{a}_D \\ \underline{a}_S \\ \underline{e}_D \\ \underline{e}_S \\ \underline{c} \end{bmatrix} \sim \text{MVN} \left( 0, \begin{bmatrix} \sigma_{A_D}^2 A & \sigma_{A_{DS}} A & 0 & 0 & 0 \\ \sigma_{A_{DS}} A^T & \sigma_{A_S}^2 A & 0 & 0 & 0 \\ 0 & 0 & \sigma_{E_D}^2 I & \sigma_{E_{DS}} I & 0 \\ 0 & 0 & \sigma_{E_{DS}} I^T & \sigma_{E_S}^2 I & 0 \\ 0 & 0 & 0 & 0 & \sigma_C^2 I \end{bmatrix} \right)$$

467

468 where  $A$  is the GRM and  $I$  the identity matrix.

469 The phenotypic covariance is:

$$\begin{aligned} 470 \quad C_{i,j} &= cov(y_i, y_j) \\ 471 \quad &= \sigma_{A_D}^2 A_{i,j} + \sigma_{A_{DS}} + \sigma_{A_S}^2 (ZAZ^T)_{i,j} + \sigma_{E_D}^2 I_{i,j} + \sigma_{E_{DS}} \{ (IZ^T)_{i,j} \\ 472 \quad &+ (ZI^T)_{i,j} \} + \sigma_{E_S}^2 (ZIZ^T)_{i,j} + \sigma_C^2 (WIW^T)_{i,j} \end{aligned}$$

473 The variances explained by DGE and SGE were calculated respectively as  
474  $sampleVar(\sigma_{A_D}^2 A) / sampleVar(C)$  and  $sampleVar(\sigma_{A_S}^2 (ZAZ^T)) / sampleVar(C)$   
475 where  $sampleVar$  is the sample variance of the corresponding covariance matrix:  
476 suppose that we have a vector  $\underline{x}$  of random variables with covariance matrix  $M$ , the  
477 sample variance of  $M$  is calculated as

$$478 \quad sampleVar(M) = \frac{Tr(PMP)}{n-1}$$

479  $Tr$  denotes the trace,  $n$  is the sample size, and  $P = I - \frac{11'}{n}$  <sup>47,48</sup>.

480

481 For those phenotypes where body weight was included as a covariate, we checked  
482 that this did not lead to systematically increased (or decreased) estimates of the  
483 aggregate contribution of SGE (collider bias).

484

485 Significance of variance components was assessed using a two-degree of freedom  
486 log likelihood ratio (LLR) test (i.e., the test statistics was assumed to follow a two-  
487 degree of freedom chi2 distribution under the null). Note that this testing procedure is  
488 conservative.

489 The Q value for the aggregate contribution of SGE was calculated for each phenotype  
490 using the R package `qvalue` <sup>49</sup>. Significant contributions at FDR < 10% were those with  
491 Q value < 0.1.

492

#### 493 *Correlation between DGE and SGE*

494

495 The correlation  $\rho$  between  $\underline{a}_D$  and  $\underline{a}_S$  was calculated as:

$$496 \quad \rho = \frac{\sigma_{A_{DS}}}{\sigma_{A_D} \times \sigma_{A_S}}$$

497

498  $\rho$  reflects the correlation between SGE and DGE *acting on the same phenotype*,  
499 similarly to how “traditional” genetic correlations measure the correlation between  
500 DGE on two traits;  $\rho$  can actually be interpreted as the correlation between DGE on

501 the traits of cage mates mediating social effects and DGE on the phenotype of interest  
502 itself.

503 We tested whether  $\rho$  was significantly different from 0 and whether  $|\rho|$  was  
504 significantly different from 1 using a one-degree of freedom LLR test.

505

506 *Simulations 1: for Supplementary\_Figure1.*

507

508 Phenotypes were simulated based on the genotypes and cage relationships of the full  
509 set of 1,812 mice. Phenotypes were drawn from model (0) with the following variances:  
510  $\sigma_{A_D}^2 = 15$ ,  $\sigma_{A_S}^2 = 8$ ,  $\rho_{A_{DS}} = 0.47$ ,  $\sigma_{E_D}^2 = 22$ ,  $\sigma_{E_S}^2 = 16$ ,  $\rho_{E_{DS}} = -0.97$ ,  $\sigma_C^2 = 26$ . These variances  
511 correspond to the median value of estimates across traits with aggregate SGE and  
512 DGE > 5%. After building the phenotypic covariance matrix, the sample variance of  
513 the simulations was calculated and used to calculate “realised” simulation parameters  
514 from the “target” parameters above. The realised parameters were used for  
515 comparison with the parameters estimated from the simulations.

516

517 *Definition of “social genotype” for sgeGWAS*

518

519 In the sgeGWAS, we assumed additive effects across cage mates and calculated the  
520 “social genotype” of a mouse as the sum of the reference allele dosages of its cage  
521 mates. The same assumptions were made by Biscarini *et al.*<sup>13</sup> and Brinker *et al.*<sup>25</sup>.

522

523 *Correlation between direct and social genotypes at a variant*

524

525 Spearman's rank correlation coefficient was used. We tested whether the correlation  
526 was different from 0 using the function cor.test in the R package stats<sup>50</sup>.

527

528 *Models used for sgeGWAS and dgeGWAS*

529

530 To test SGE of a particular variant, we compared the following two models:

531

$$532 \quad y_f = X_f \underline{b} + a_{D,f} + e_{D,f} + Z_f \underline{a}_S + Z_f \underline{e}_S + W_f \underline{c} + G_f b_D \quad (1, \text{null})$$

533

534  $y_f = X_f \underline{b} + a_{D,f} + e_{D,f} + Z_f \underline{a}_S + Z_f \underline{e}_S + W_f \underline{c} + G_f b_D + Z_f G b_S$  (2, alternative)

535

536 Here,  $G$  is the vector of direct genotypes at the tested variant,  $b_D$  the estimated  
537 coefficient for local DGE and  $b_S$  the estimated coefficient for local SGE.

538 The models were fitted using LIMIX<sup>51,52</sup> with the covariance of the model estimated  
539 only once per phenotype, in the model with no local genetic effect (model 0).

540 The significance of local SGE was calculated by comparing models (1) and (2) with a  
541 1-degree of freedom LLR test.

542 We refer to the inclusion of  $G_f b_D$  in model (1, null) as “conditioning”.

543

544 dgeGWAS was carried out similarly, by comparing the null model (3) below and model  
545 (2) above:

546  $y_f = X_f \underline{b} + a_{D,f} + e_{D,f} + Z_f \underline{a}_S + Z_f \underline{e}_S + W_f \underline{c} + Z_f G b_S$  (3, null)

547 We refer to the inclusion of  $Z_f G b_S$  in model (3, null) as “conditioning”.

548

#### 549 *Identification of genome-wide significant associations*

550 Because we wanted to compare the architecture of DGE and SGE *for each phenotype*  
551 *independently*, we adopted the per-phenotype FDR approach used by Nicod et al.<sup>26</sup>.

552 Had we used a study-wide FDR approach instead, the comparison of SGE and DGE  
553 loci for a given phenotype would have depended on the SGE and DGE loci identified  
554 for the other phenotypes in the dataset.

555 The procedure we used to control the FDR accounts for the fact that we report  
556 loci rather than individual variants<sup>53</sup>, where a locus is defined as the 1.5 Mb-wide  
557 window around a SNP (this window size is the average 95% confidence interval for  
558 DGE QTLs in <sup>26</sup>). More precisely, for each phenotype and for each type of genetic  
559 effect (social and direct), we ran 100 “permuted GWAS” by permuting the rows of the  
560 matrix of social (respectively direct) genotypes, and testing each variant at a time using  
561 the permuted genotypes together with the un-permuted phenotypes, covariates, GRM  
562 and matrix of direct (respectively social) genotypes (for conditioning). See <sup>52,54</sup> for  
563 references on this permutation approach. For each permutation we then compiled a  
564 list of loci that would be significant at a nominal P value of 0.01. Using the un-permuted  
565 data, we similarly compiled a list of loci that would be significantly associated at a  
566 nominal P value of 0.01. Ordering the latter in order of decreasing significance and

567 going down the list, we calculated for each locus an associated FDR until the FDR  
568 was above 10%. For a given P value x, the FDR was calculated as:

$$569 \quad FDR(x) = \frac{\# \text{ loci with } P < x \text{ in permuted data}}{100 \times \# \text{ loci with } P < x \text{ in unpermuted data}}$$

570

571 We report only those loci whose P value corresponds to an FDR < 10%.

572

573 *Definition of candidate genes at associated loci* (Table 2)

574

575 At each significantly associated locus we defined a 1.5Mb window centred on the lead  
576 variant, identified all the variants that segregate in this window based on the full set of  
577 7M variants, and reran the sgeGWAS locally with all the variants at the locus. We  
578 highlighted those genes that are located within the most significantly associated  
579 segments and whose MGI symbol does not start by 'Gm', 'Rik', 'Mir', 'Fam', or 'Tmem'  
580 in order to enrich the reported sets in genes with known function.

581

582 *Variance explained by a genome-wide significant association*

583

584 The variance explained by a genome-wide significant SGE association was estimated  
585 in an extension of model (0) with additional fixed effects for both direct and social  
586 effects of lead SNPs at all genome-wide significant SGE loci (the lead SNP being the  
587 SNP with the most significant P value at the locus in the sgeGWAS). After fitting the  
588 model, the variance was calculated as:

589

$$591 \quad \frac{\text{var}(ZGb_S)}{\sum \text{var}(X_c b_c) + \sum \text{var}(Gb_D) + \sum \text{var}(ZGb_S) + \text{sampleVar}(C)}$$

590

592 where  $\text{sampleVar}(C)$  is the sample variance of the covariance matrix in this model.

593

594 The variance explained by a genome-wide significant DGE association was estimated  
595 in a similar model but considering all genome-wide significant DGE associations and  
596 calculated as:

$$597 \quad \frac{\text{var}(Gb_D)}{\sum \text{var}(X_c b_c) + \sum \text{var}(Gb_D) + \sum \text{var}(ZGb_S) + \text{sampleVar}(C)}$$

598

599 *Variance explained jointly by all genome-wide significant SGE or DGE associations*  
600 *for a phenotype*

601

602 The variance explained jointly by all significant SGE associations was estimated using  
603 the same model as above with all genome-wide significant SGE associations and  
604 calculated as:

$$606 \frac{\sum \text{var}(ZGb_S)}{\sum \text{var}(X_c b_c) + \sum \text{var}(Gb_D) + \sum \text{var}(ZGb_S) + \text{sampleVar}(C)}$$

605

607 The variance explained jointly by all significant DGE associations was estimated using  
608 the same model as above with all genome-wide significant DGE associations and  
609 calculated as:

610

$$612 \frac{\sum \text{var}(Gb_D)}{\sum \text{var}(X_c b_c) + \sum \text{var}(Gb_D) + \sum \text{var}(ZGb_S) + \text{sampleVar}(C)}$$

611

613 *Simulations 2: for Supplementary Figure 2d.*

614

615 Phenotypes were simulated based on the genotypes and cage relationships of the full  
616 set of 1,812 mice. Phenotypes were simulated as the sum of random effects and local  
617 DGE (from model (1)), with the following parameters:  $\sigma_{A_D}^2 = 5$  or 20,  $\sigma_{A_S}^2 = 5$  or 20,  
618  $\rho_{A_{DS}} = 0.5$ ,  $\sigma_{E_D}^2 = 30$ ,  $\sigma_{E_S}^2 = 30$ ,  $\rho_{E_{DS}} = -0.97$ ,  $\sigma_C^2 = 25$ . The values for  $\rho_{A_{DS}}$ ,  $\sigma_{E_D}^2$ ,  $\sigma_{E_S}^2$ ,  $\rho_{E_{DS}}$ ,  
619 and  $\sigma_C^2$  were close to the median of the corresponding estimates from the real data.  
620  $\sigma_{A_D}^2 = 5$  and  $\sigma_{A_S}^2 = 5$  correspond to low polygenic effects in the real data, and  $\sigma_{A_D}^2 =$   
621 20 and  $\sigma_{A_S}^2 = 20$  correspond to high polygenic effects in the real data. We simulated  
622 local DGE at random variants in the genome, and simulated variances of 0, 5, 20 or  
623 50.

624 The results we show in Supplementary Figure 2d are based on a subset of  
625 simulations:  $\sigma_{A_D}^2 = 20$  and  $\sigma_{A_S}^2 = 20$  and local DGE variance of 20.

626

627 *Simulations 3: for Supplementary Figure 3a-d, and Figure 3a.*

628

629 Phenotypes were simulated based on the real genotypes but random cages for a  
630 random subset of 1,800 mice (in order to be able to draw full cages of 2 or 3 mice).  
631 Phenotypes were simulated as the sum of random effects, local DGE and local SGE  
632 (model (2) except for  $Z$ ) with the following parameters:  $\sigma_{A_D}^2 = 17$ ,  $\sigma_{A_S}^2 = 17$ ,  $\rho_{A_{DS}} = 0.65$ ,  
633  $\sigma_{E_D}^2 = 19$ ,  $\sigma_{E_S}^2 = 15$ ,  $\rho_{E_{DS}} = -0.8$ ,  $\sigma_C^2 = 25$ . Those values correspond to the median  
634 estimates for phenotypes with aggregate SGE and DGE  $> 0.1$ .

635 We simulated local SGE and DGE at variants where direct and social  
636 genotypes were either lowly correlated (Spearman correlation negative log P value  $<$   
637  $0.05$ ) or more highly correlated (Spearman correlation negative log P value  $>$   $0.2$ ), and  
638 had with low MAF (MAF  $<$   $0.05$ ), medium MAF ( $0.225 <$  MAF  $<$   $0.275$ ) or high MAF  
639 (MAF  $>$   $0.45$ ). We simulated local DGE with an allelic effect of 0 or 1 (1 corresponds to  
640 a large effect in the real data). We simulated local SGE under two alternative  
641 generative models: an “additive” model by using  $Z$  as in model (2) (i.e. filled with 0s  
642 and 1s) or a “proportional” model by using  $Z' = Z/N$ . In all cases we simulated an  
643 allelic effect of 0.2 (similar to the average allelic effect estimated in the SGE GWAS).  
644 The sample variance of the simulated local DGE term is  $\text{var}(Gb_D) = 2p(1-p)b_D^2$ ; it  
645 is  $\text{var}(ZGb_S) = 2Np(1-p)b_S^2$  for the local SGE term simulated under the additive  
646 model, and  $\text{var}\left(\frac{Z}{N}Gb_S\right) = 2Np(1-p)/N^2 b_S^2$  for the local SGE component simulated  
647 under the proportional model.

648  
649 The results we show in Supplementary Figure 3a-d are based on a subset of  
650 simulations with group size 3 and are averaged across low, medium and high MAF.  
651 Power was calculated at a genome-wide significance threshold of negative log P 5,  
652 which is similar to the significance of associations detected at FDR  $<$  10%.

653 The results we show in Figure 3a are based on a subset of simulations with  
654 group size 2 and 3, no local DGE, and averaged across high and low genotypic  
655 correlations. Power was also calculated at a genome-wide significance threshold of  
656 negative log P 5.

657

658 *Scripts used in this study*

659

660 All the scripts used in this study are available from <http://github.com/limix/SGE>.

661 LIMIX can be downloaded from <http://github.com/limix/limix>.



662

## 663 **Acknowledgements**

664

665 We would like to thank Na Cai and Robert W. Davis for helpful discussion of the data  
666 from Nicod et al.<sup>26</sup> and Davies et al.<sup>27</sup>, as well as Ewan Birney, Emma Huang, Richard  
667 Mott, Abraham A. Palmer, and Sandra Sanchez-Roige for comments on a previous  
668 version of this manuscript. AB was supported by a fellowship from the Wellcome Trust  
669 (105941/Z/14/Z).

670

671

## 672 References

673

- 674 1. Griffing, B. Selection in reference to biological groups I. Individual and group selection  
675 applied to populations of unordered groups. *Australian Journal of Biological Sciences*  
676 **20**, 127–140 (1967).
- 677 2. Moore, A.J., Brodie III, E.D. & Wolf, J.B. Interacting phenotypes and the evolutionary  
678 process: I. Direct and indirect genetic effects of social interactions. *Evolution* **51**, 1352–  
679 1362 (1997).
- 680 3. Wolf, J.B., Brodie III, E.D., Cheverud, J.M., Moore, A.J. & Wade, M.J. Evolutionary  
681 consequences of indirect genetic effects. *Trends in ecology & evolution* **13**, 64–69  
682 (1998).
- 683 4. Bergsma, R., Kanis, E., Knol, E.F. & Bijma, P. The contribution of social effects to  
684 heritable variation in finishing traits of domestic pigs (*Sus scrofa*). *Genetics* **178**, 1559–  
685 1570 (2008).
- 686 5. Bijma, P. The quantitative genetics of indirect genetic effects: a selective review of  
687 modelling issues. *Heredity* **112**, 61 (2014).
- 688 6. Wilson, A.J., Gelin, U., Perron, M.-C. & Réale, D. Indirect genetic effects and the  
689 evolution of aggression in a vertebrate system. *Proceedings of the Royal Society of*  
690 *London B: Biological Sciences* **276**, 533–541 (2009).
- 691 7. Ashbrook, D.G., Gini, B. & Hager, R. Genetic variation in offspring indirectly influences  
692 the quality of maternal behaviour in mice. *Elife* **4**, 11814 (2015).
- 693 8. Ashbrook, D.G., Sharmin, N. & Hager, R. Offspring genes indirectly influence sibling  
694 and maternal behavioural strategies over resource share. in *Proc. R. Soc. B* Vol. 284  
695 20171059 (The Royal Society, 2017).
- 696 9. Baud, A. *et al.* Genetic variation in the social environment contributes to health and  
697 disease. *PLoS genetics* **13**, e1006498 (2017).
- 698 10. Domingue, B.W. *et al.* The social genome of friends and schoolmates in the National  
699 Longitudinal Study of Adolescent to Adult Health. *Proceedings of the National*  
700 *Academy of Sciences*, 201711803 (2018).
- 701 11. Kong, A. *et al.* The nature of nurture: Effects of parental genotypes. *Science* **359**, 424–  
702 428 (2018).
- 703 12. Bates, T.C. *et al.* The Nature of Nurture: Using a Virtual-Parent Design to Test  
704 Parenting Effects on Childrens Educational Attainment in Genotyped Families. *Twin*  
705 *Research and Human Genetics*, 1–11 (2018).
- 706 13. Biscarini, F. *et al.* Across-line SNP association study for direct and associative effects  
707 on feather damage in laying hens. *Behavior genetics* **40**, 715–727 (2010).
- 708 14. Visscher, P.M., Brown, M.A., McCarthy, M.I. & Yang, J. Five years of GWAS discovery.  
709 *The American Journal of Human Genetics* **90**, 7–24 (2012).

- 710 15. Ferrero, D.M. *et al.* A juvenile mouse pheromone inhibits sexual behaviour through  
711 the vomeronasal system. *Nature* **502**, 368 (2013).
- 712 16. Ross, K.G. & Keller, L. Genetic control of social organization in an ant. *Proceedings of*  
713 *the National Academy of Sciences* **95**, 14232–14237 (1998).
- 714 17. Mutic, J.J. & Wolf, J.B. Indirect genetic effects from ecological interactions in  
715 *Arabidopsis thaliana*. *Molecular ecology* **16**, 2371–2381 (2007).
- 716 18. Bailey, N.W. & Hoskins, J.L. Detecting cryptic indirect genetic effects. *Evolution* **68**,  
717 1871–1882 (2014).
- 718 19. Wolf, J.B. Genetic architecture and evolutionary constraint when the environment  
719 contains genes. *Proceedings of the National Academy of Sciences* **100**, 4655–4660  
720 (2003).
- 721 20. Muir, W.M. Incorporation of Competitive Effects in Plant or Animal Breeding  
722 Programs. *Genetics* (2005).
- 723 21. Bijma, P., Muir, W.M., Ellen, E.D., Wolf, J.B. & Van Arendonk, J.A. Multilevel selection  
724 2: estimating the genetic parameters determining inheritance and response to  
725 selection. *Genetics* **175**, 289–299 (2007).
- 726 22. Bijma, P., Muir, W.M. & Van Arendonk, J.A. Multilevel selection 1: quantitative  
727 genetics of inheritance and response to selection. *Genetics* **175**, 277–288 (2007).
- 728 23. McGlothlin, J.W., Moore, A.J., Wolf, J.B. & Brodie III, E.D. Interacting phenotypes and  
729 the evolutionary process. III. Social evolution. *Evolution* **64**, 2558–2574 (2010).
- 730 24. Bijma, P. & Wade, M.J. The joint effects of kin, multilevel selection and indirect genetic  
731 effects on response to genetic selection. *Journal of evolutionary biology* **21**, 1175–  
732 1188 (2008).
- 733 25. Brinker, T., Bijma, P., Vereijken, A. & Ellen, E.D. The genetic architecture of socially–  
734 affected traits: a GWAS for direct and indirect genetic effects on survival time in laying  
735 hens showing cannibalism. *Genetics Selection Evolution* **50**, 38 (2018).
- 736 26. Nicod, J. *et al.* Genome-wide association of multiple complex traits in outbred mice by  
737 ultra-low-coverage sequencing. *Nature genetics* **48**, 912 (2016).
- 738 27. Davies, R.W., Flint, J., Myers, S. & Mott, R. Rapid genotype imputation from sequence  
739 without reference panels. *Nature genetics* **48**, 965 (2016).
- 740 28. Haeffel, G.J. & Hames, J.L. Cognitive Vulnerability to Depression Can Be Contagious.  
741 *Clinical Psychological Science* **2**, 75–85 (2014).
- 742 29. Rosenquist, J.N., Murabito, J., Fowler, J.H. & Christakis, N.A. The spread of alcohol  
743 consumption behavior in a large social network. *Annals of internal medicine* **152**, 426–  
744 433 (2010).
- 745 30. Grant, J.D. *et al.* Spousal concordance for alcohol dependence: evidence for  
746 assortative mating or spousal interaction effects? *Alcoholism: Clinical and*  
747 *Experimental Research* **31**, 717–728 (2007).

- 748 31. Bolger, N., DeLongis, A., Kessler, R. C. & Wethington, E. The contagion of stress across  
749 multiple roles. *Journal of Marriage and the Family*, 175–183 (1989).
- 750 32. Christakis, N.A. & Fowler, J.H. The spread of obesity in a large social network over 32  
751 years. *New England journal of medicine* **357**, 370–379 (2007).
- 752 33. Cohen–Cole, E. & Fletcher, J.M. Detecting implausible social network effects in acne,  
753 height, and headaches: longitudinal analysis. *Bmj* **337**, a2533 (2008).
- 754 34. Yalcin, B. *et al.* Commercially available outbred mice for genome–wide association  
755 studies. *PLoS genetics* **6**, e1001085 (2010).
- 756 35. Smyth, I. *et al.* A mouse model of harlequin ichthyosis delineates a key role for Abca12  
757 in lipid homeostasis. *PLoS genetics* **4**, e1000192 (2008).
- 758 36. Yoshida, S. *et al.* Involvement of an NKG2D ligand H60c in epidermal dendritic T cell–  
759 mediated wound repair. *The Journal of Immunology* **188**, 3972–3979 (2012).
- 760 37. Li, Y. *et al.* Differential expression of hippocampal EphA4 and ephrinA3 in anhedonic–  
761 like behavior, stress resilience, and antidepressant drug treatment after chronic  
762 unpredicted mild stress. *Neuroscience letters* **566**, 292–297 (2014).
- 763 38. Visscher, P.M. *et al.* 10 years of GWAS discovery: biology, function, and translation.  
764 *The American Journal of Human Genetics* **101**, 5–22 (2017).
- 765 39. Baud, A. & Flint, J. Identifying genes for neurobehavioural traits in rodents: progress  
766 and pitfalls. *Disease models & mechanisms* **10**, 373–383 (2017).
- 767 40. Manolio, T.A. *et al.* Finding the missing heritability of complex diseases. *Nature* **461**,  
768 747 (2009).
- 769 41. Valdar, W. *et al.* Genome–wide genetic association of complex traits in heterogeneous  
770 stock mice. *Nature genetics* **38**, 879 (2006).
- 771 42. Sequencing, R.G. *et al.* Combined sequence–based and genetic mapping analysis of  
772 complex traits in outbred rats. *Nature genetics* **45**, 767 (2013).
- 773 43. Bastiampillai, T., Allison, S. & Chan, S. Is depression contagious? The importance of  
774 social networks and the implications of contagion theory. *Australian & New Zealand*  
775 *Journal of Psychiatry* **47**, 299–303 (2013).
- 776 44. Domingue, B.W., Fletcher, J., Conley, D. & Boardman, J.D. Genetic and educational  
777 assortative mating among US adults. *Proceedings of the National Academy of Sciences*  
778 **111**, 7996–8000 (2014).
- 779 45. Robinson, M.R. *et al.* Genetic evidence of assortative mating in humans. *Nature*  
780 *Human Behaviour* **1**, 0016 (2017).
- 781 46. Venerables, W. & Ripley, B. Modern applied statistics with S. (new york: Springer,  
782 2002).
- 783 47. Kang, H.M. *et al.* Variance component model to account for sample structure in  
784 genome–wide association studies. *Nature genetics* **42**, 348–354 (2010).
- 785 48. Searle, S.R. *Matrix algebra useful for statistics*, (Wiley, 1982).

- 786 49. Dabney, A., Storey, J.D. & Warnes, G. qvalue: Q-value estimation for false discovery  
787 rate control. *R package version 1* (2010).
- 788 50. Best, D. & Roberts, D. Algorithm AS 89: the upper tail probabilities of Spearman's rho.  
789 *Journal of the Royal Statistical Society. Series C (Applied Statistics)* **24**, 377–379  
790 (1975).
- 791 51. Lippert, C., Casale, F., Rakitsch, B. & Stegle, O. LIMIX: genetic analysis of multiple traits.  
792 (2014).
- 793 52. Casale, F.P., Rakitsch, B., Lippert, C. & Stegle, O. Efficient set tests for the genetic  
794 analysis of correlated traits. *Nature methods* **12**, 755 (2015).
- 795 53. Brzyski, D. *et al.* Controlling the rate of GWAS false discoveries. *Genetics* **205**, 61–75  
796 (2017).
- 797 54. Sudmant, P.H. *et al.* An integrated map of structural variation in 2,504 human  
798 genomes. *Nature* **526**, 75 (2015).
- 799
